# Supplementary material
Source: Springer Nature journal article supplement (https://www.springermedizin.de/resource/supplementary/12872_2009_288_MOESM7_ESM.pdf/9429622)

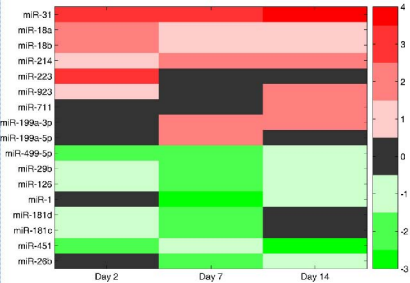

Supplement: MOESM7 [file 9429622]
